# Supplementary material for: A G-quadruplex DNAzyme-based colorimetric method for facile detection of Alicyclobacillus acidoterrestris
Source: Royal Society of Chemistry journal article supplement (doi:10.1039/c4an00643g), 2014-06-09
Supplement: c4an00643g1.pdf [file c4an00643g1.pdf]

## Supporting information

### A G-quadruplex DNAzyme based colorimetric method for facile detection of

#### *Alicyclobacillus acidoterrestris*

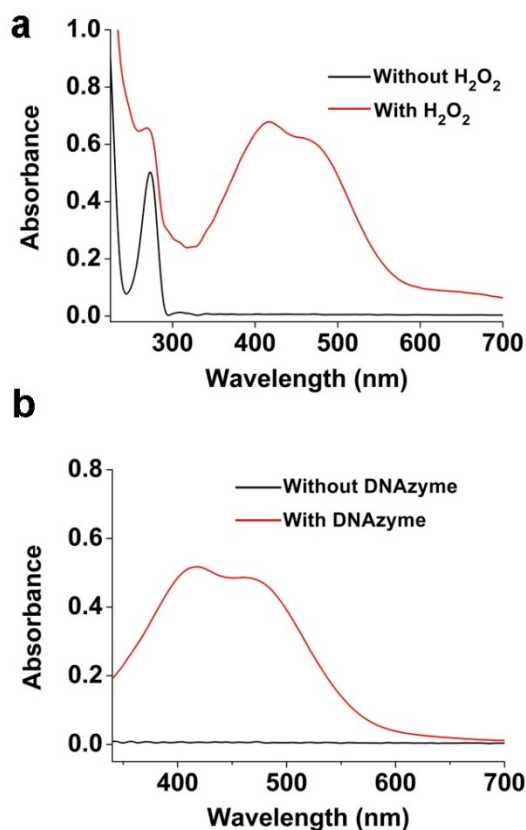

Fig. S1 (a) UV-vis absorption spectra of probe solution (25 mM KHP-NaOH, 0.5  $\mu$ M DNA, 1  $\mu$ M hemin, 0.05% Triton X-100 (v/v), 150 mM NaCl, 20 mM KCl, and 1 mM guaiacol, pH 5) in the absence of H<sub>2</sub>O<sub>2</sub> and in the presence of 4 mM H<sub>2</sub>O<sub>2</sub>. (b) UV-vis absorption spectra of probe solution (25 mM KHP-NaOH, 0.05% Triton X-100 (v/v), 150 mM NaCl, and 1 mM guaiacol and 4 mM H<sub>2</sub>O<sub>2</sub>, pH 5) with DNAzyme and without DNAzyme.

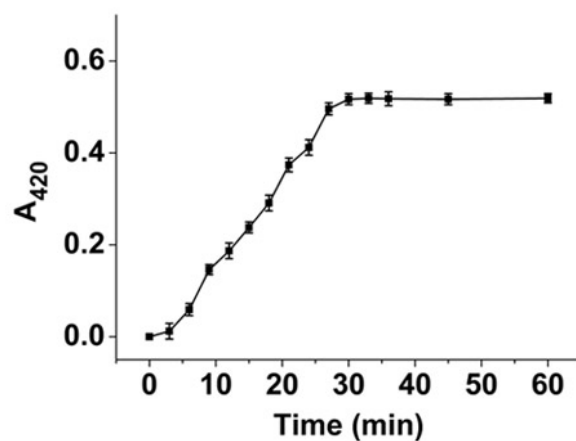

Fig. S2 Time-dependent absorbance changes at 420 nm to analyze the guaiacol catalytically polymerized reaction.

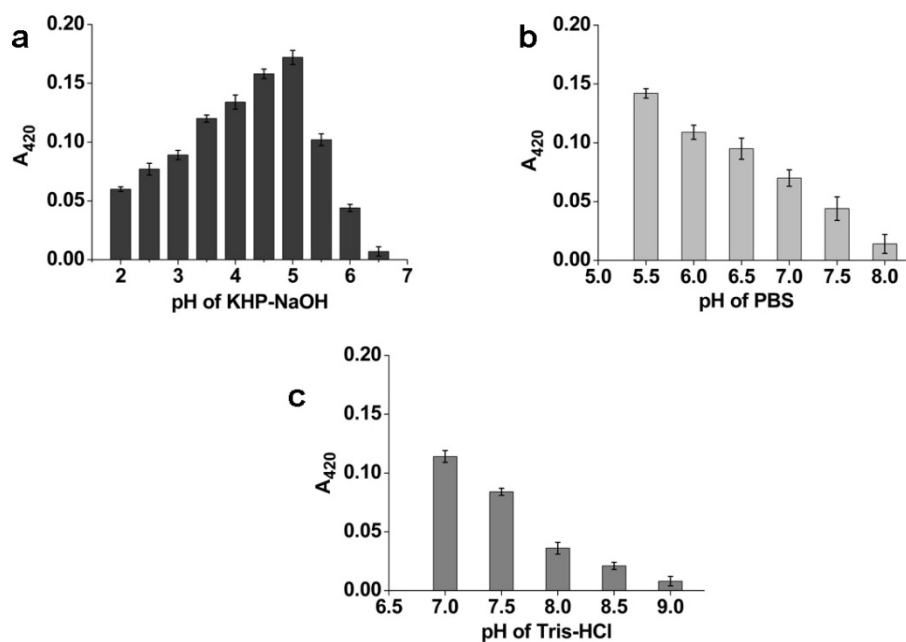

Fig. S3 Effect of pH value in different buffer solutions for guaiacol polymerization: (a) KHP-NaOH buffer solutions with pH from 2 to 6.5, (b) PBS buffer solutions with pH

from 5.5 to 8.0 and (c) Tris-HCl buffer solutions with pH from 7.0 to 9.0.

**Table S1** The composition of 402 broth.

| Composition            | Elements                                            | Amounts (g L <sup>-1</sup> ) |
|------------------------|-----------------------------------------------------|------------------------------|
| Basal medium           | CaCl <sub>2</sub> ·2H <sub>2</sub> O                | 0.25                         |
|                        | MgSO <sub>4</sub> ·7H <sub>2</sub> O                | 0.50                         |
|                        | (NH <sub>4</sub> ) <sub>2</sub> SO <sub>2</sub>     | 0.20                         |
|                        | KH <sub>2</sub> PO <sub>4</sub>                     | 3.00                         |
|                        | yeast extract                                       | 2.00                         |
|                        | glucose                                             | 5.00                         |
| Trace element solution | ZnSO <sub>4</sub> ·7H <sub>2</sub> O                | 0.10                         |
|                        | MnCl <sub>2</sub> ·4H <sub>2</sub> O                | 0.03                         |
|                        | H <sub>3</sub> BO <sub>3</sub>                      | 0.30                         |
|                        | CoCl <sub>2</sub> ·6H <sub>2</sub> O                | 0.20                         |
|                        | CuCl <sub>2</sub> ·2H <sub>2</sub> O                | 0.01                         |
|                        | NiCl <sub>2</sub> ·6H <sub>2</sub> O                | 0.02                         |
|                        | Na <sub>2</sub> MoO <sub>4</sub> ·2H <sub>2</sub> O | 0.03                         |
| Agar power             | Agar <sup>a</sup>                                   | 15-20                        |

<sup>a</sup>The agar power is needed to prepare 402 solid medium.
